# Supplementary material for: The Challenge of Robotic Surgery in Oncology - A Feasibility Study with the Senhance™ Surgical System
Source: Research Square preprint supplement (doi:10.21203/rs.3.rs-7484304/v1), 2025-09-05
Supplement: Supplementary file 1 [file 0f5944a95a2db91dd5c799f8.xlsx]

## Sheet: Sheet1
Parameter	Gastrointestinal Surgery (n=292)	Gynecological Surgery (n=58)	Urological Surgery (n=616)	Total (n=966)
Age (years)1	66.0 (12.1)	54.6 (14.3)	63.3 (6.6)	63.6 (9.5)
Sex (Female)2	134 (45.9%)	58 (100%)	3 (0.5%)	195 (20.2%)
Presence of Comorbidities2	71 (24.3%)	12 (20.7%)	211 (34.3%)	294 (30.4%)
1mean (SD)
2N (%)
