# Supplementary material for: The Challenge of Robotic Surgery in Oncology - A Feasibility Study with the Senhance™ Surgical System
Source: Research Square preprint supplement (doi:10.21203/rs.3.rs-7484304/v1), 2025-09-05
Supplement: Supplementary file 2 [file 370db11b374d8703c56d5dae.xlsx]

## Sheet: Sheet1
Parameter	Metrics/ Details	Gastrointestinal Surgery (n=292)	Gynecological Surgery (n=58)	Urological Surgery (n=616)	Total (n=966)
Duration of surgery1	mean (SD)	186.7 (56.8)	99.9 (33.2)	204.5 (49.7)	192.9 (56.8)
	min-max	55.2 - 403.8	43.2 - 169.8	94.8 - 364.8	43.2 - 403.8
Docking time1	mean (SD)	6.6 (7.0)	4.2 (4.1)	7.6 (11.9)	7.1 (10.3)
	min-max	1.0 - 53.0	1.0 - 20.0	1.0 - 95.0	1.0 - 95.0
Duration of console1	mean (SD)	74.7 (66.6)	44.1 (34.1)	125.2 (62.2)	105.5 (68.0)
	min-max	1.0 - 326 .0	1.0 - 109.0	1.0 - 305.0	1.0 - 326.0
Conversion	none	282 (96.6%)	52 (89.7%)	586 (95.1%)	920 (95.2%)
	laparoscopy	1 (0.3%)	4 (6.9%)	26 (4.2%)	31 (3.2%)
	open surgery	6 (2.1%)	2 (3.4%)	2 (0.3%)	10 (1.0%)
	laparoscopy + open surgery	1 (0.3%)	-	-	1 (0.1%)
1in minutes
