# Supplementary material for: The Challenge of Robotic Surgery in Oncology - A Feasibility Study with the Senhance™ Surgical System
Source: Research Square preprint supplement (doi:10.21203/rs.3.rs-7484304/v1), 2025-09-05
Supplement: Supplementary file 3 [file 506edb501417615de4556b23.xlsx]

## Sheet: Sheet1
Parameter	Detail	Gastrointestinal Surgery (n=292)	Gynecological Surgery (n=58)	Urological Surgery (n=616)	Total (n=966)
Number of instruments used	2	53 (18.2%)	-	2 (0.3%)	55 (5.7%)
	3	62 (21.2%)	2 (3.4%)	11 (1.8%)	75(7.8%)
	4	108 (37.0%)	9 (15.5%)	157 (25.5%)	274 (28.4%)
	5	57 (19.5%)	8 (13.8%)	159 (25.8%)	224 (23.2%)
	6	8 (2.7%)	22 (37.9%)	131 (21.3%)	161 (16.7%)
	7	1 (0.3%)	12 (20.7%)	110 (17.9%)	123 (12.7%)
	8	-	3 (5.2%)	35 (5.7%)	38(3.9%)
	9	-	2 (3.4%)	9 (1.5%)	11(1.1%)
	10	-	-	1 (0.2%)	1(0.1%)
Number of instruments used	mean (SD)	3.7 (1.1)	5.9 (1.3)	5.5 (1.3)	5.0 (1.5)
Number of instrument changes	0	54 (18.5%)	-	2 (0.3%)	56 (5.8%)
	1	62 (21.2%)	2 (3.4%)	11 (1.8%)	75 (7.8%)
	2	110 (37.7%)	9 (15.5%)	157 (25.5%)	276 (28.6%)
	3	55 (18.8%)	8 (13.8%)	159 (25.8%)	222 (23.0%)
	4	8 (2.7%)	22 (37.9%)	131 (21.3%)	161 (16.7%)
	5	1 (0.3%)	12 (20.7%)	110 (17.9%)	123 (12.7%)
	6	-	3 (5.2%)	35 (5.7%)	38 (3.9%)
	7	-	2 (3.4%)	9 (1.5%)	11 (1.1%)
	8	-	-	1 (0.2%)	1 (0.1%)
Number of instrument changes	mean (SD)	1.7 (1.1)	3.9 (1.3)	3.5 (1.3)	3.0 (1.5)
