# Supplementary material for: The Challenge of Robotic Surgery in Oncology - A Feasibility Study with the Senhance™ Surgical System
Source: Research Square preprint supplement (doi:10.21203/rs.3.rs-7484304/v1), 2025-09-05
Supplement: Supplementary file 4 [file 7a8aa81ad9cca296b1aff266.xlsx]

## Sheet: Sheet1
Parameter	Gastrointestinal Surgery (n=292)	Gynecological Surgery (n=58)	Urological Surgery (n=616)	Total (n=966)
Sigmoid Resection	34 (11.6%)	-	-	34 (3.5%)
Rectal Resection	173 (59.2%)	-	-	173 (17.9%)
Gastric resection	2 (0.7%)	-	-	2 (0.2%)
Hemicolectomy right	78 (26.7%)	-	-	78 (8.1%)
Liver surgery	5 (1.7%)	-	-	5 (0.5%)
Ovarian cyst enucleation	-	13 (22.4%)	-	13 (1.3%)
Bilateral oophorectomy	-	1 (1.7%)	-	1 (0.1%)
Monolateral salpingo-oophorectomy	-	2 (3.4%)	-	2 (0.2%)
Bilateral salpingo-oophorectomy	-	3 (5.2%)	-	3 (0.3%)
Radical hysterectomy	-	35 (60.3%)	-	35 (3.6%)
Pelvic lymphadenectomy	-	1 (1.7%)	-	1 (0.1%)
Sentinel node mapping	-	3 (5.2%)	-	3 (0.3%)
Radical prostatectomy	-	-	615 (99.8%)	615 (63.7%)
Lymph node dissection	-	-	1 (0.2%)	1 (0.1%)
