# Supplementary material for: The Challenge of Robotic Surgery in Oncology - A Feasibility Study with the Senhance™ Surgical System
Source: Research Square preprint supplement (doi:10.21203/rs.3.rs-7484304/v1), 2025-09-05
Supplement: Supplementary file 5 [file c213cbbb4d5b7eb649fd1117.xlsx]

## Sheet: Sheet1
Parameter	Detail	Gastrointestinal Surgery (n=292)	Gynecological Surgery (n=58)	Urological Surgery (n=616)	Total (n=966)
Robot malfunction	Console malfunction	-	1 (1.7%)	1 (0.2%)	2 (0.2%)
	Monitor/camera malfunction	-	2 (3.4%)	4 (0.6%)	6 (0.6%)
	Limited motion	71 (24.3%)	10 (17.2%)	115 (18.7%)	196 (20.3%)
	Collision	55 (18.8%)	3 (5.2%)	36 (5.8%)	94 (9.7%)
	Other malfunction	2 (0.7%)	1 (1.7%)	15 (2.4%)	18 (1.9%)
