# Supplementary material for: The Challenge of Robotic Surgery in Oncology - A Feasibility Study with the Senhance™ Surgical System
Source: Research Square preprint supplement (doi:10.21203/rs.3.rs-7484304/v1), 2025-09-05
Supplement: Supplementary file 6 [file f9c7307e5559bc8a411fd188.xlsx]

## Sheet: Sheet1
Parameter	Gastrointestinal Surgery (n=292)	Gynecological Surgery (n=58)	Urological Surgery (n=616)	Total (n=966)
Needle Holder Right (Ø 5 mm, length 310 mm)	2 (0.7%)	40 (69.0%)	410 (66.7%)	452 (46.9%)
Needle Holder Left -(Ø 5 mm, length 310 mm)	45 (15.5%)	27 (46.6%)	174 (28.3%)	246 (25.5%)
Allis Grasper (Ø 5 mm, length 310 mm)	8 (2.8%)	12 (20.7%)	137 (22.3%)	157 (16.3%)
Monopolar Curved Metzenbaum Scissors (Ø 5 mm, length 310 mm)	62 (21.4%)	35 (60.3%)	540 (87.8%)	637 (66.1%)
Monopolar Maryland Dissector (Ø 5 mm, length 310 mm)	67 (23.1%)	8 (13.8%)	411 (66.8%)	486 (50.5%)
Monopolar L-Hook Electrode (Ø 5 mm, length 310 mm)	198 (68.3%)	52 (89.7%)	253 (41.1%)	503 (52.2%)
Bipolar Large Grasping Forceps (Ø 5 mm, length 310 mm)	160 (55.2%)	48 (82.8%)	225 (36.6%)	433 (45.0%)
Adaptor, Bipolar Maryland Dissector (Ø 5 mm, length 310 mm)	67 (23.1%)	16 (27.6%)	267 (43.4%)	350 (36.3%)
Hem-o-lok ML (Ø 5 mm, length 310 mm)	74 (25.5%)	1 (1.7%)	242 (39.3%)	317 (32.9%)
Ultrasonic Handpiece --- (Ø 5.5 mm, length 370 mm) (box of 10)	270 (93.1%)	18 (31.0%)	205 (33.3%)	493 (51.2%)
